# Supplementary material for: FGF21 modulates immunometabolic homeostasis via the ALOX15/15-HETE axis in early liver graft injury
Source: PubMed Central journal article supplement — Nat Commun. 2024 Oct 3;15:8578. doi: 10.1038/s41467-024-52379-2 (PMC11449914; doi:10.1038/s41467-024-52379-2), 2024-10-03
Supplement: 41467_2024_52379_MOESM1_ESM.pdf [file 41467_2024_52379_MOESM1_ESM.pdf]

## Supplementary Information

### FGF21 modulates immunometabolic homeostasis via the ALOX15/15-HETE axis in early liver graft injury

Xinyu Yang\*, Hao Chen\*, Wei Shen\*, Yuanming Chen\*, Zuyuan Lin, Jianyong Zhuo, Shuai Wang, Modan Yang, Huigang Li, Chiyu He, Xuanyu Zhang, Zhihang Hu, Zhengxing Lian, Mengfan Yang, Rui Wang, Changbiao Li, Binhua Pan, Li Xu, Jun Chen, Xuyong Wei, Qiang Wei, Haiyang Xie, Shusen Zheng, Di Lu\*\*, Xiao Xu\*\*

#### Table of contents

|                                |    |
|--------------------------------|----|
| Supplementary Figure S1 -----  | 2  |
| Supplementary Figure S2 -----  | 3  |
| Supplementary Figure S3 -----  | 4  |
| Supplementary Figure S4 -----  | 6  |
| Supplementary Figure S5 -----  | 8  |
| Supplementary Figure S6 -----  | 9  |
| Supplementary Figure S7 -----  | 11 |
| Supplementary Figure S8 -----  | 12 |
| Supplementary Figure S9 -----  | 13 |
| Supplementary Figure S10 ----- | 14 |
| Supplementary Figure S11 ----- | 15 |
| Supplementary Table S1 -----   | 16 |
| Supplementary Table S2 -----   | 19 |
| Supplementary Table S3 -----   | 21 |
| Supplementary Table S4 -----   | 23 |
| Supplementary Table S5 -----   | 24 |

## Supplementary figures:

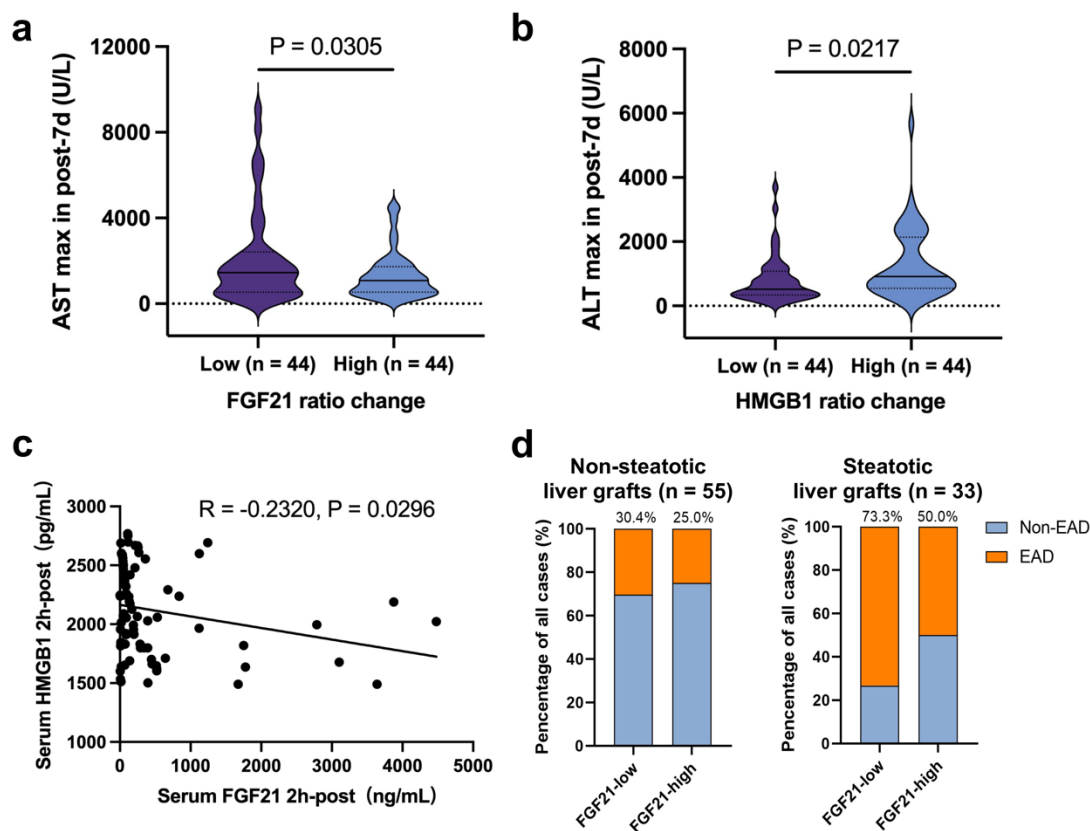

**Figure S1. The association of FGF21 levels with short-term clinical outcomes in patients after liver transplantation.**

(a) The association between the ratio change of peripheral FGF21 level and maximal AST within 7 days after transplantation. (b) The 88 patients were divided into the HMGB1-elevated group (n = 44) and non-elevated group (n = 44) according to the median value of ratio change (post-reperfusion/pre-transplant). The association between the ratio change of peripheral HMGB1 level and maximal ALT within 7 days after transplantation. (c) The correlation analysis between the peripheral FGF21 level and HMGB1 level 2 hours after reperfusion (n = 88). (d) Comparisons of EAD percentages for non-steatotic or steatotic liver grafts. Two-tailed t-test. Statistic data are presented as the mean  $\pm$  SD, error bars represent the means of at least three independent experiments. *p* values are shown on the graphs, *p* < 0.05 was considered statistically significant, source data are provided as a Source Data file.

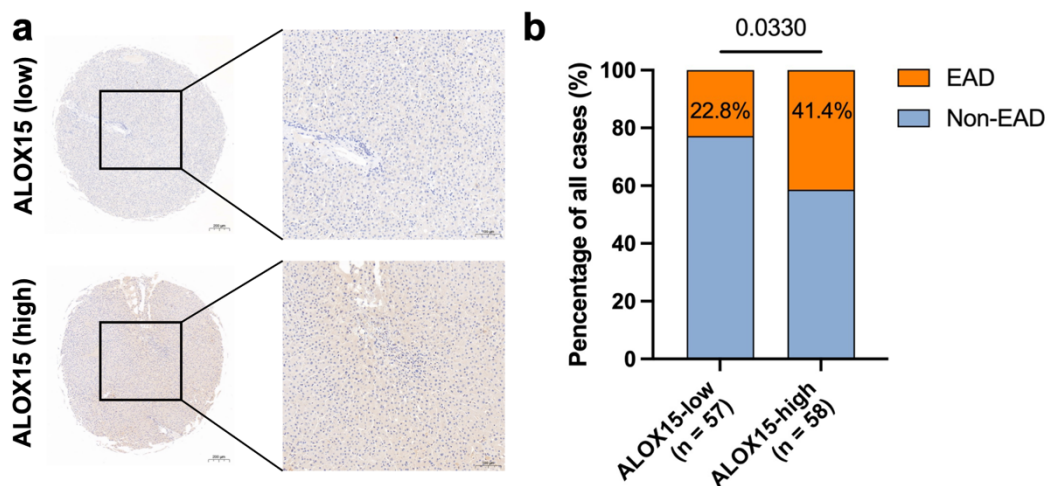

**Figure S2. The association of ALOX15 levels in pre-transplant liver graft biopsies with short-term clinical outcomes in patients after liver transplantation.**

(a) IHC staining for ALOX15 in pre-transplant liver graft biopsies from Cohort 2 (n = 115). (b) Comparison of the incidence of EAD in recipients between the low ALOX15 group and the high ALOX15 group. Categorical variables were compared using two-sided Pearson's chi-square test. *p* values are shown on the graphs, *p* < 0.05 was considered statistically significant, source data are provided as a Source Data file.

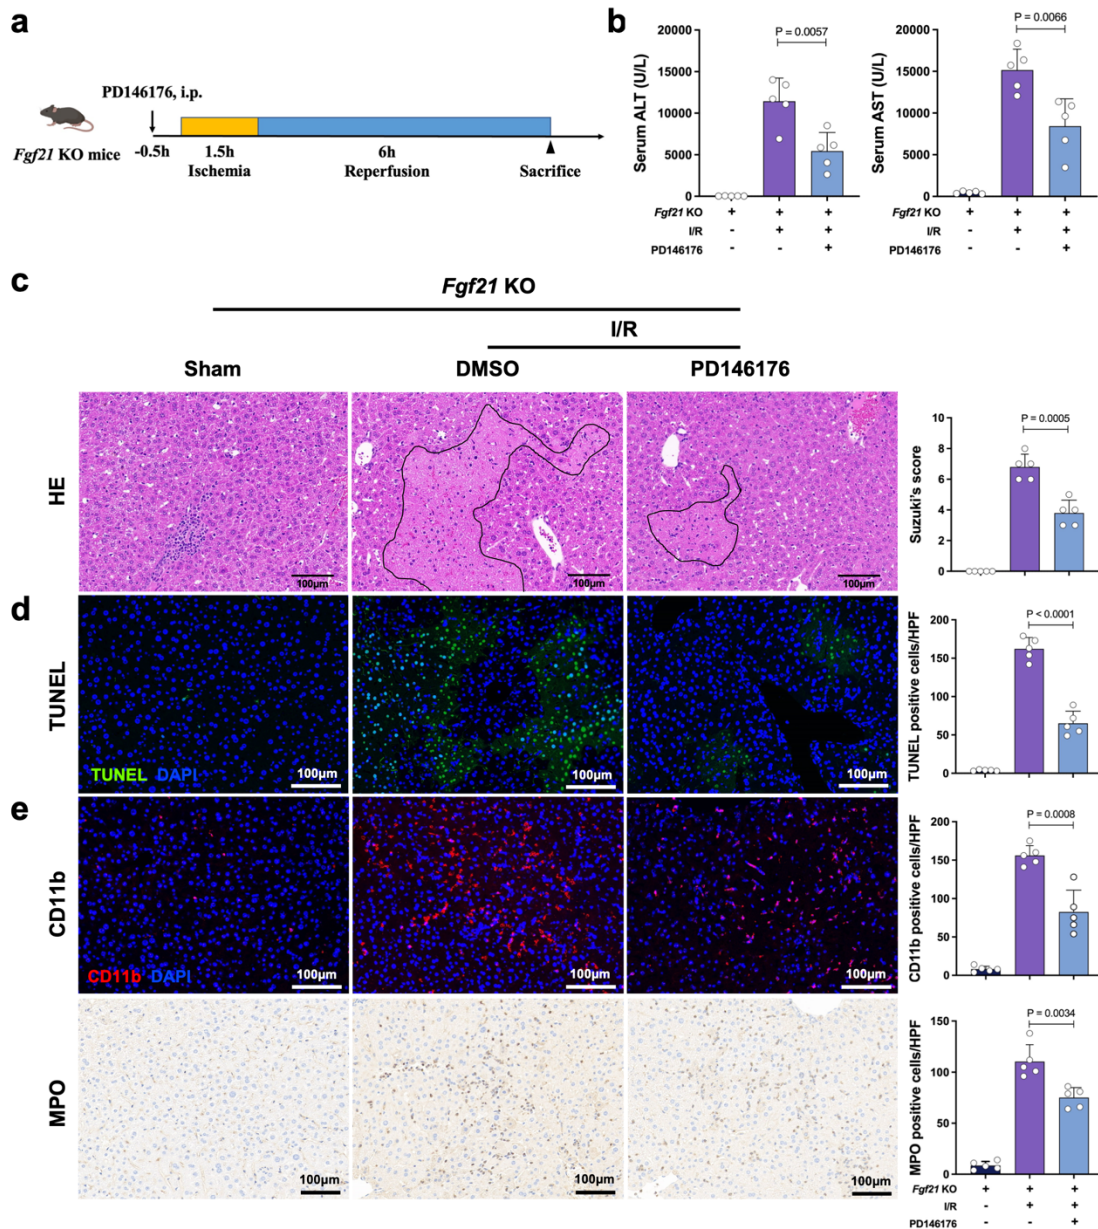

**Figure S3. A repression of ALOX15 alleviated I/R injury in *Fgf21* KO mice.**

(a) The experimental schema for establishing the mouse I/R injury model. The *Fgf21* KO mice were intravenously administered PD146176 (10 mg/kg), n = 5 mice/group. (b) Serum ALT and AST levels for each group 6 hours after reperfusion (n = 5, per group). (c-e) Representative H&E staining, TUNEL staining, CD11b and MPO IHC staining of liver sections from each group and quantification assessment (n = 5, per group). Two-tailed t-test. Statistic data are presented as the mean  $\pm$  SD, error bars represent the means of at least three independent experiments. *p* values are shown on the graphs, *p* < 0.05 was considered statistically significant. Source data are provided as a Source Data file. Figure S4a created with BioRender. com



released under a Creative Commons Attribution-NonCommercial-NoDerivs 4.0 International license (<https://creativecommons.org/licenses/by-nc-nd/4.0/deed.en>).

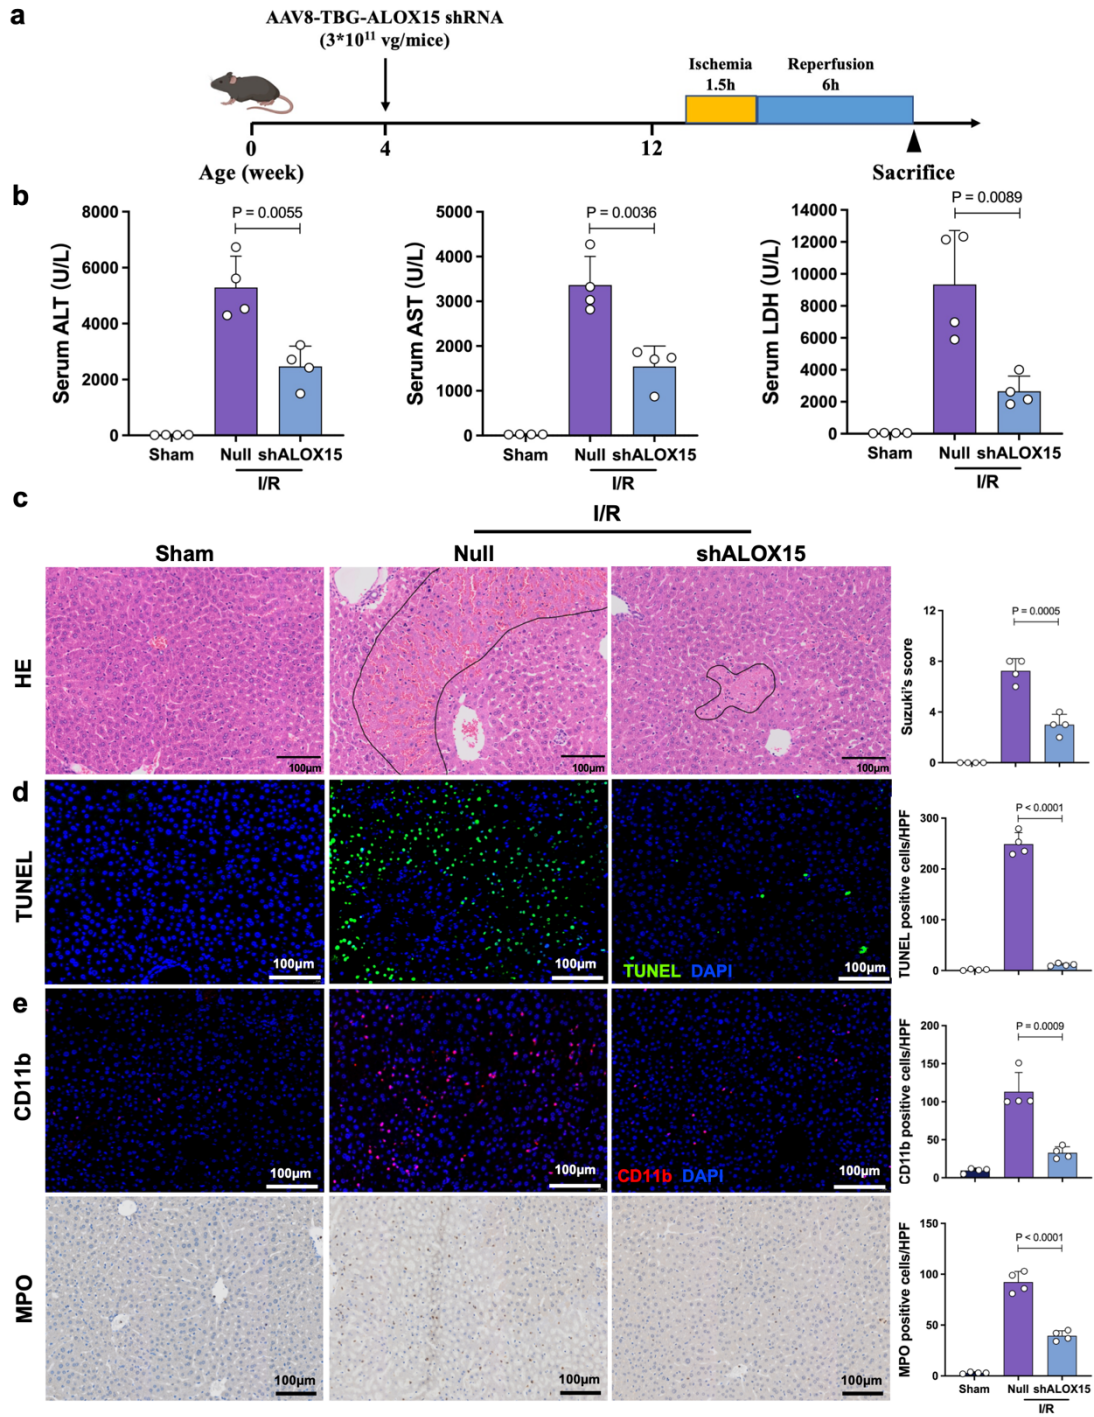

**Figure S4. The shRNA-mediated knockdown of *Alox15* alleviated I/R-induced hepatocellular injury.**

(a) Experimental schema for establishing mouse I/R injury model pre-treated with shAlox15. (b) Serum ALT and AST levels of sham, I/R with and without shAlox15 groups 6 h following reperfusion (n = 4, per group). (c-e) representative H&E staining, TUNEL staining, CD11b and MPO IHC staining of liver sections 6 h following reperfusion (n = 4, per group). Two-tailed t-

test. Statistic data are presented as the mean  $\pm$  SD, error bars represent the means of at least three independent experiments. *p* values are shown on the graphs, *p* < 0.05 was considered statistically significant. Source data are provided as a Source Data file. Figure S5a created with BioRender. com released under a Creative Commons Attribution-NonCommercial-NoDerivs 4.0 International license (<https://creativecommons.org/licenses/by-nc-nd/4.0/deed.en>).

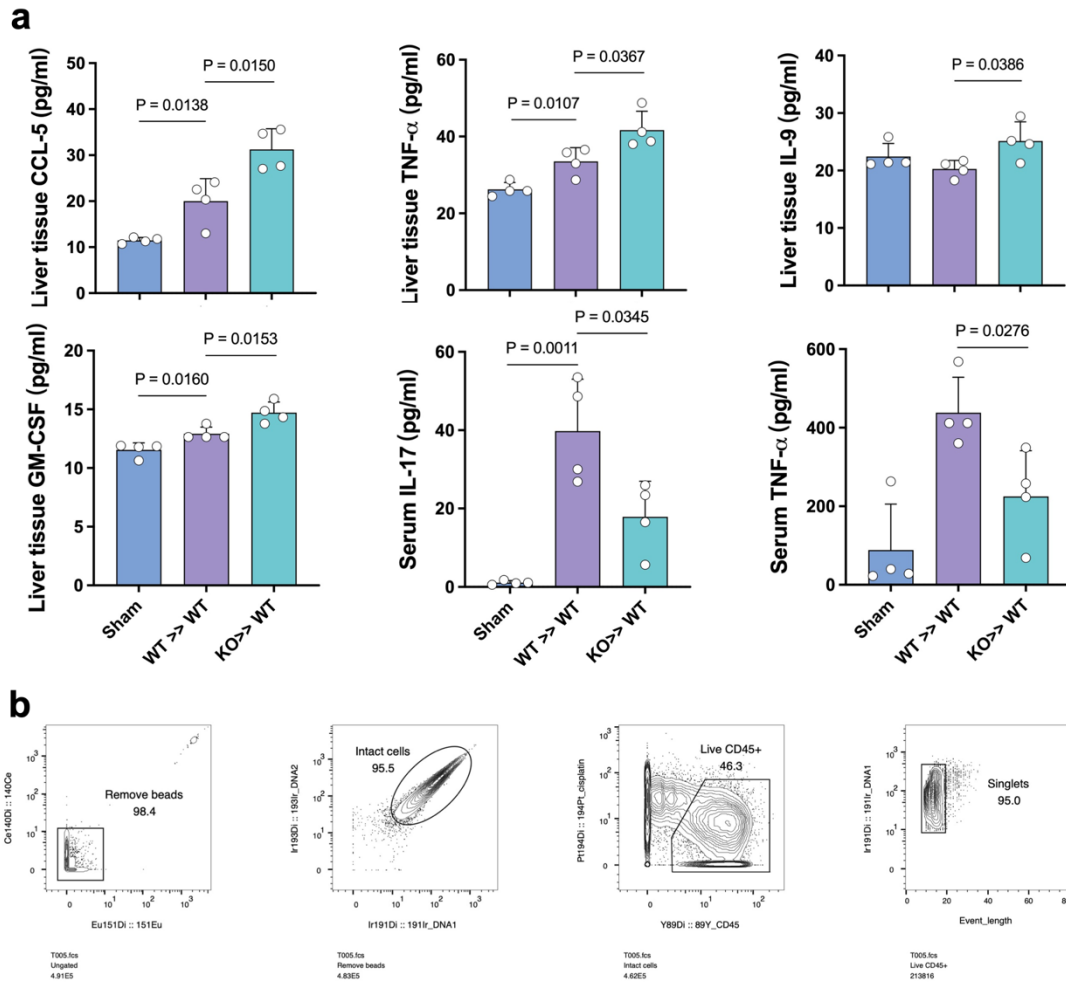

**Figure S5. Cytokines and immune cells in mouse liver tissues after transplantation.**

**(a)** Comparative analysis of multiplex cytokines in mouse serum after liver transplantation ( $n = 4$ , per group). **(b)** Gating strategy for immune cells analyzed with mass cytometry. Two-tailed  $t$ -test. Statistic data are presented as the mean  $\pm$  SD, error bars represent the means of at least three independent experiments.  $p$  values are shown on the graphs,  $p < 0.05$  was considered statistically significant. Source data are provided as a Source Data file.

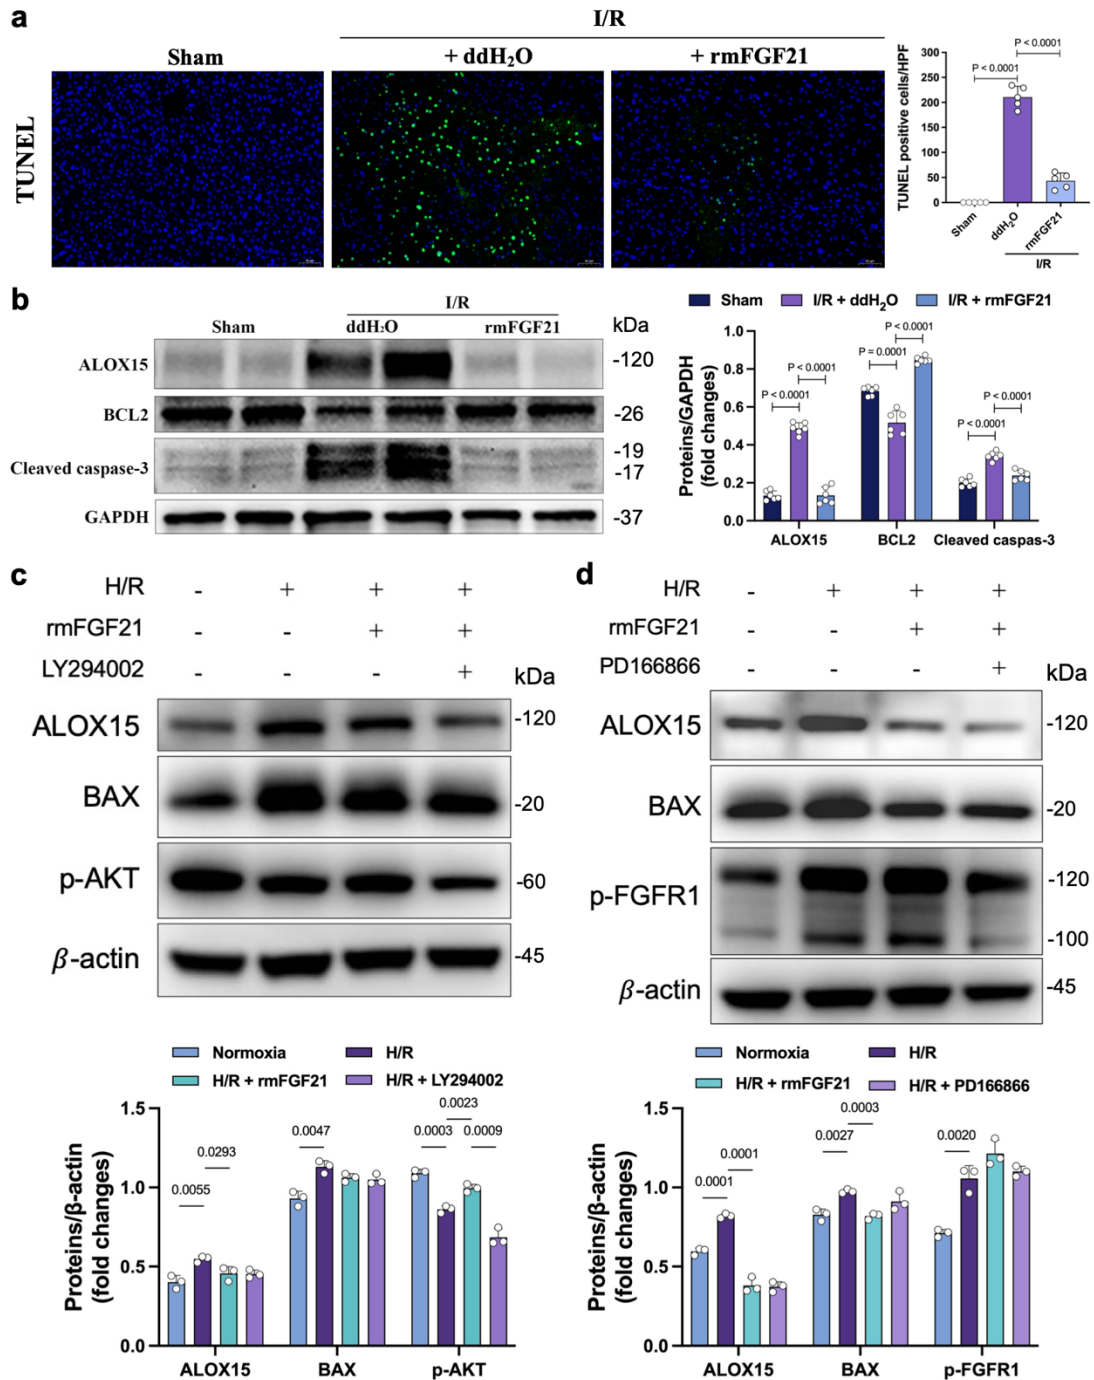

**Figure S6. rmFGF21 treatment protected hepatocytes against I/R-insult.**

(a) TUNEL immunofluorescent staining 6 hours after reperfusion (n = 5, per group). (b) Western blot analysis (left) and quantification (right) of ALOX15, BCL-2 and Cleaved caspase-3 in livers from each group. (c) Western blot analysis (up) and quantification (down) of ALOX15, BAX and p-AKT in AML12 from each group. (d) Western blot analysis (up) and quantification (down) of ALOX15, BAX and p-FGFR1 in AML12 from each group. **b-d**, three

independent biological mice samples. Two-tailed t-test. Statistic data are presented as the mean  $\pm$  SD, error bars represent the means of at least three independent experiments.  $p$  values are shown on the graphs,  $p < 0.05$  was considered statistically significant. Source data are provided as a Source Data file.



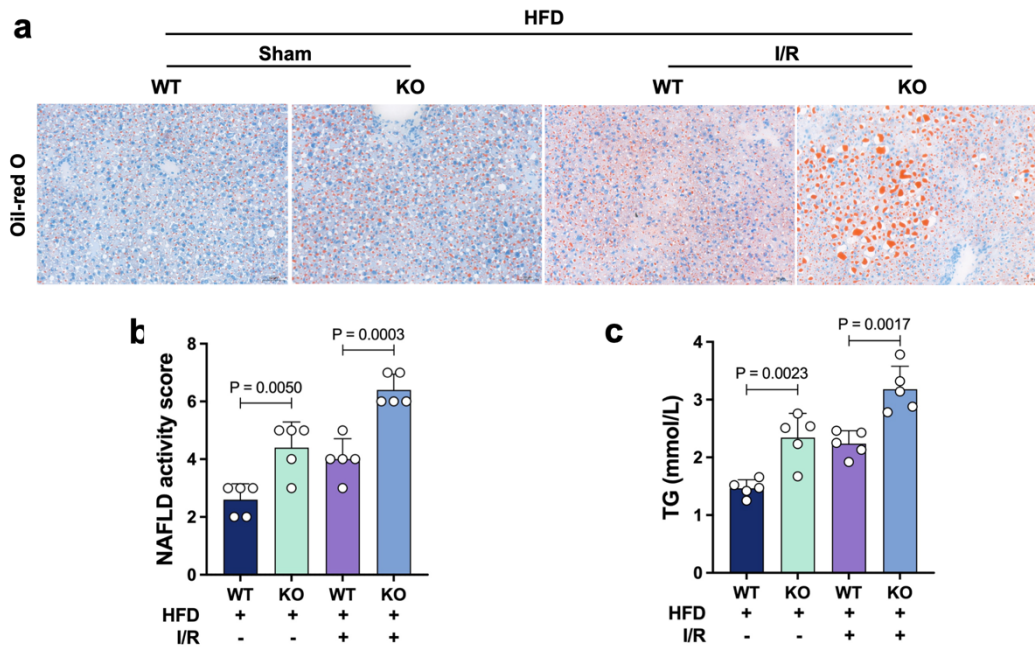

**Figure S7. FGF21 deficiency deteriorated hepatic steatosis after I/R treatment.**

(a) Oil red O staining of liver 6 h following reperfusion. (b) NAFLD activity score was evaluated 6h after reperfusion (n = 5, per group). (c) Serum TG 6 h following reperfusion were determined (n = 5, per group). Two-tailed t-test. Statistic data are presented as the mean  $\pm$  SD, error bars represent the means of at least three independent experiments. *p* values are shown on the graphs, *p* < 0.05 was considered statistically significant. Source data are provided as a Source Data file.

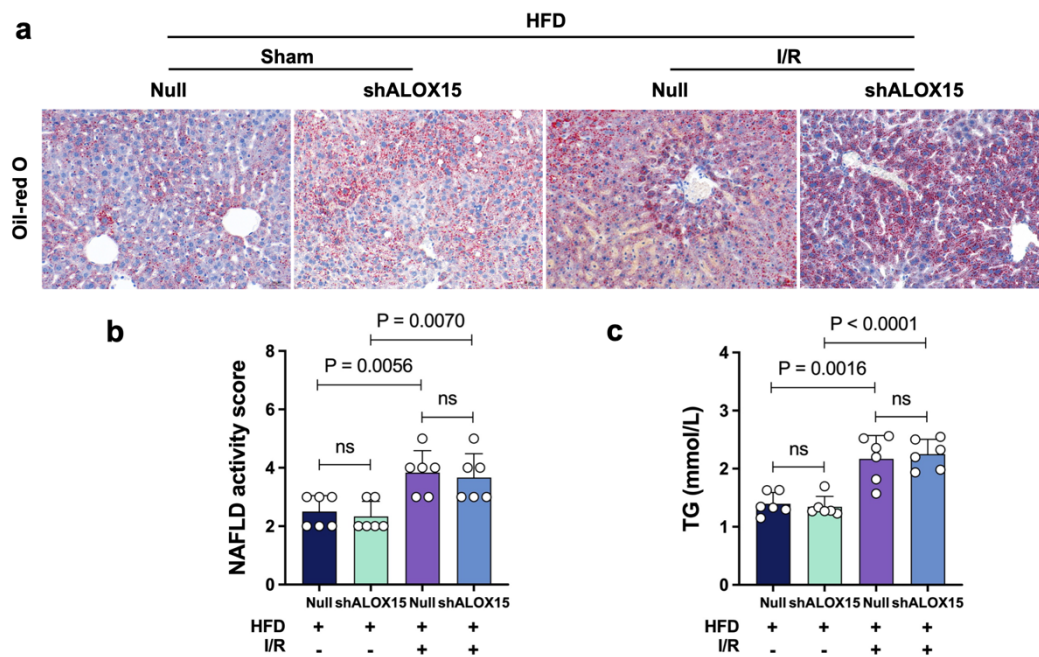

**Figure S8. Transgenic overexpression of hepatic *Alox15* attenuated hepatic steatosis after I/R treatment.**

(a) Oil red O staining of liver 6 h following reperfusion. (b) NAFLD activity score was evaluated 6 h after reperfusion (n = 6, per group). (c) Serum TG 6 h following reperfusion were determined (n = 6, per group). Two-tailed t-test. Statistic data are presented as the mean  $\pm$  SD, error bars represent the means of at least three independent experiments. *p* values are shown on the graphs, *p* < 0.05 was considered statistically significant. Source data are provided as a Source Data file.

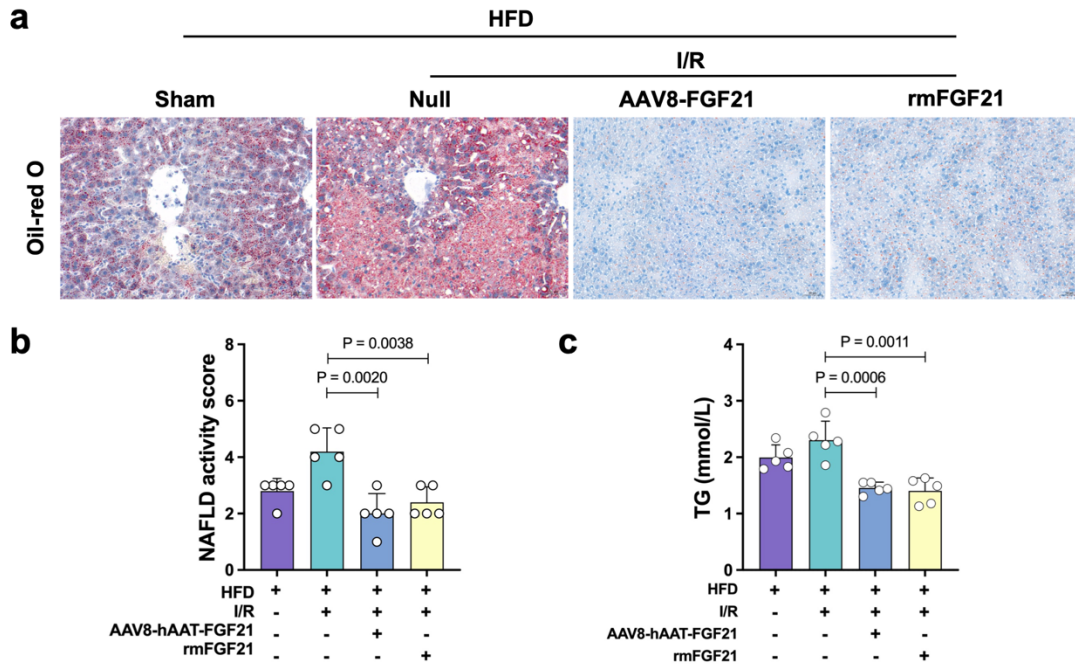

**Figure S9. Transgenic overexpression of hepatic *Fgf21* or infusion with rmFGF21 attenuated hepatic steatosis after I/R treatment.**

(a) Oil red O staining of liver 6 h following reperfusion. (b) NAFLD activity score was evaluated 6 h after reperfusion (n = 5, per group). (c) Serum TG 6 h following reperfusion were determined (n = 5, per group). Two-tailed t-test. Statistic data are presented as the mean  $\pm$  SD, error bars represent the means of at least three independent experiments. *p* values are shown on the graphs, *p* < 0.05 was considered statistically significant. Source data are provided as a Source Data file.

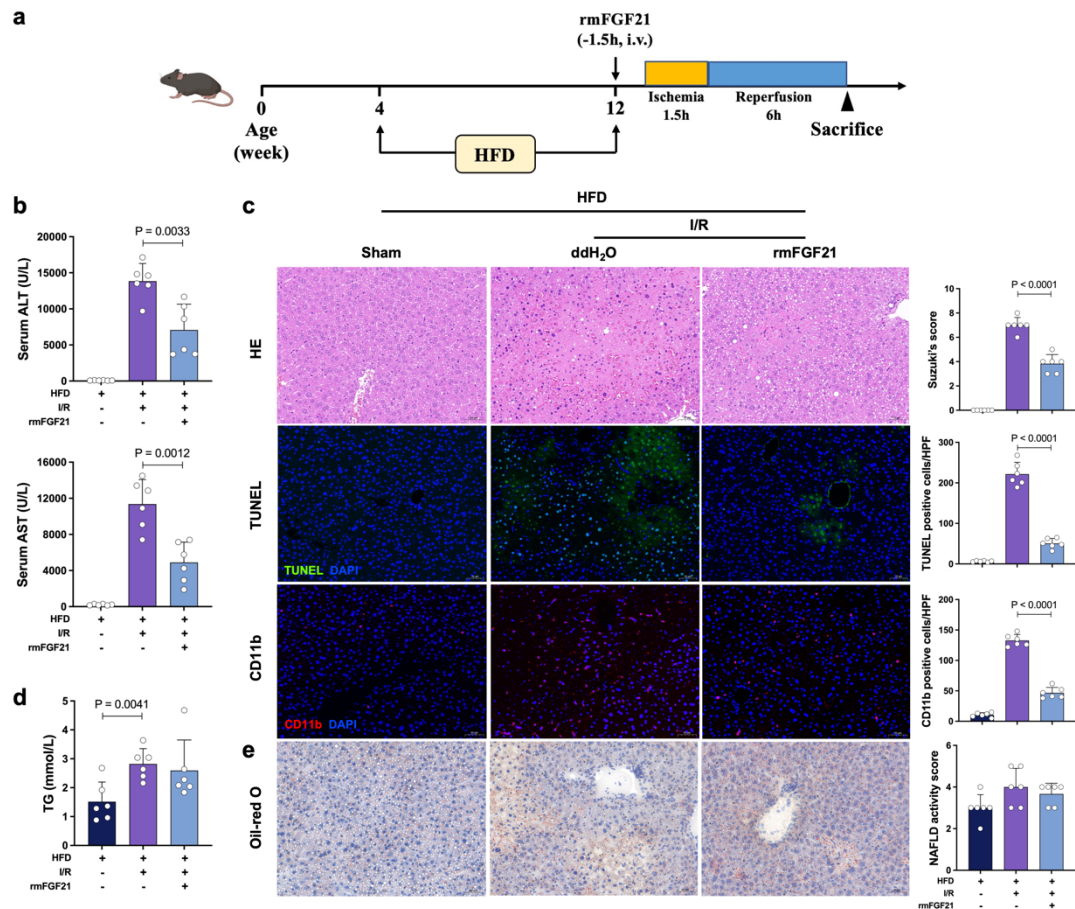

**Figure S10. Treatment with rmFGF21 alleviated I/R-induced hepatocellular injury in HFD livers.**

(a) Experimental schema for establishing the I/R injury mouse model. The HFD-fed mice were intravenously administered rmFGF21 (0.5 mg/kg). (b) Serum ALT and AST levels 6 hours after reperfusion (n = 6, per group). (c) H&E, TUNEL and CD11b staining and quantification results of liver sections from each group 6 hours after reperfusion (n = 6, per group). (d) Serum TG 6 h following reperfusion were determined (n = 6, per group). (e) Left: Oil red O staining of liver 6 h following reperfusion; right: NAFLD activity score was evaluated 6 h after reperfusion (n = 6, per group). Two-tailed t-test. Statistic data are presented as the mean ± SD, error bars represent the means of at least three independent experiments. *p* values are shown on the graphs, *p* < 0.05 was considered statistically significant. Source data are provided as a Source Data file. Figure S11a created with BioRender. com released under a Creative Commons Attribution-NonCommercial-NoDerivs 4.0 International license (<https://creativecommons.org/licenses/by-nc-nd/4.0/deed.en>).

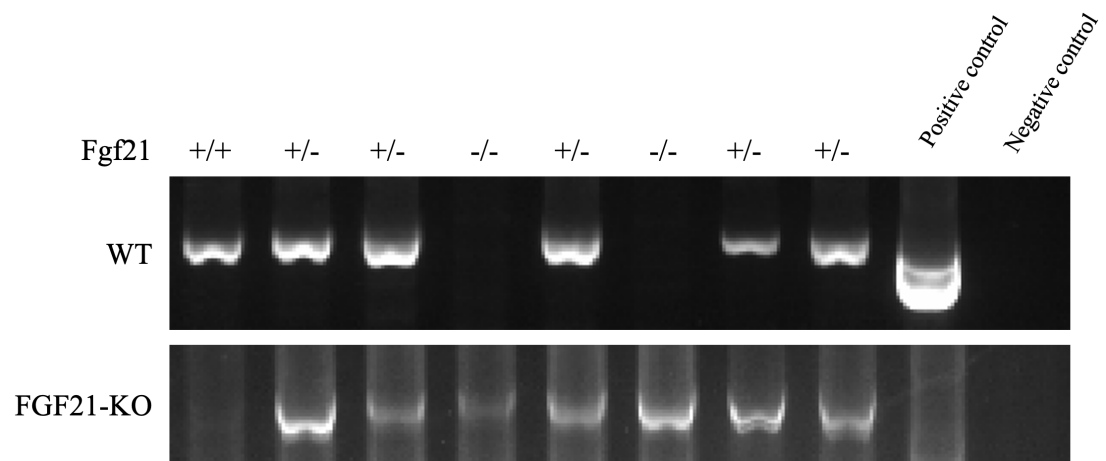

**Figure S11. Representative *Fgf21* genotyping results of WT, HET and KO mice.** WT, wild-type; HET, heterozygous; KO, knockout.

**Table S1. Baseline characteristics and clinicopathological features of patients involving the detection of circulating FGF21.**

|                                       | Total (n = 88)     | High-FGF21 change<br>(n = 44) | Low-FGF21 change<br>(n = 44) | P     |
|---------------------------------------|--------------------|-------------------------------|------------------------------|-------|
| <b>Donor characteristics</b>          |                    |                               |                              |       |
| Age (y)                               | 42.6 ± 13.9        | 40.0 ± 13.3                   | 45.1 ± 14.1                  | 0.089 |
| Sex                                   |                    |                               |                              | 0.027 |
| Male                                  | 72 (81.8%)         | 40 (90.9%)                    | 32 (72.7%)                   |       |
| Female                                | 16 (18.2%)         | 4 (9.1%)                      | 12 (27.3%)                   |       |
| BMI (kg/m <sup>2</sup> )              | 22.4 ± 2.4         | 22.3 ± 2.6                    | 22.6 ± 2.2                   | 0.543 |
| Steatosis                             |                    |                               |                              | 0.367 |
| Yes                                   | 13 (14.8%)         | 5 (11.4%)                     | 8 (18.2%)                    |       |
| No                                    | 75 (85.2%)         | 39 (88.6%)                    | 36 (81.8%)                   |       |
| Preoperative lab tests                |                    |                               |                              |       |
| ALT (U/L) <sup>a</sup>                | 33.0 (18.0-55.0)   | 33.5 (20.5-68.0)              | 32.0 (15.0-50.0)             | 0.259 |
| AST (U/L) <sup>b</sup>                | 51.0 (34.0-88.0)   | 50.0 (32.0-93.0)              | 57.5 (35.0-85.0)             | 0.699 |
| Bilirubin (μmol/L) <sup>c</sup>       | 15.2 (10.2-24.1)   | 13.0 (10.2-23.5)              | 17.4 (10.2-24.8)             | 0.693 |
| PLT (10 <sup>9</sup> /L) <sup>d</sup> | 136.0 (65.5-209.5) | 148.5 (62.0-209.5)            | 123.0 (67.5-211.5)           | 0.799 |
| <b>Transplant characteristics</b>     |                    |                               |                              |       |
| Donor type                            |                    |                               |                              | 0.517 |
| DBD                                   | 37 (42.0%)         | 17 (38.6%)                    | 20 (45.5%)                   |       |
| DCD                                   | 51 (58.0%)         | 27 (61.4%)                    | 24 (54.5%)                   |       |
| CIT (h)                               | 8.7 (6.4-11.2)     | 8.9 (6.5-11.2)                | 8.6 (6.4-11.5)               | 0.836 |
| DWIT (min)                            | 9.5 (3.0-14.8)     | 10.0 (1.0-15.0)               | 9.0 (5.0-13.0)               | 0.720 |
| ABO match                             |                    |                               |                              | 0.653 |
| Compatible                            | 58 (65.9%)         | 30 (68.2%)                    | 28 (63.6%)                   |       |
| Incompatible                          | 30 (34.1%)         | 14 (31.8%)                    | 16 (36.4%)                   |       |



|                                  |                    |                    |                    |       |
|----------------------------------|--------------------|--------------------|--------------------|-------|
| The cause of graft failure       |                    |                    |                    | 0.992 |
| Primary non-function             | 5 (5.7%)           | 2 (4.5%)           | 3 (6.8%)           |       |
| Hepatic artery thrombosis        | 4 (4.5%)           | 2 (4.5%)           | 2 (4.5%)           |       |
| Biliary complication             | 7 (8.0%)           | 3 (6.8%)           | 4 (9.1%)           |       |
| Chronic rejection                | 9 (10.2%)          | 4 (9.1%)           | 5 (11.4%)          |       |
| <b>Recipient characteristics</b> |                    |                    |                    |       |
| Age (y)                          | 48.1 ± 10.1        | 48.1 ± 10.5        | 48.2 ± 9.8         | 0.992 |
| Sex                              |                    |                    |                    | 0.764 |
| Male                             | 75 (85.2%)         | 37 (84.1%)         | 38 (86.4%)         |       |
| Female                           | 13 (14.8%)         | 7 (15.9%)          | 6 (13.6%)          |       |
| BMI (kg/m <sup>2</sup> )         | 23.1 ± 3.8         | 23.6 ± 4.4         | 22.6 ± 2.9         | 0.226 |
| Preoperative lab tests           |                    |                    |                    |       |
| ALT (U/L)                        | 56.5 (20.3-162.3)  | 32.0 (17.0-173.0)  | 57.5 (25.8-157.0)  | 0.480 |
| AST (U/L)                        | 75.5 (37.0-165.0)  | 63.0 (36.0-145.0)  | 89.5 (42.0-180.8)  | 0.422 |
| Bilirubin (µmol/L)               | 191.0 (45.3-414.0) | 158.0 (47.8-414.0) | 226.5 (26.0-419.8) | 0.795 |
| PT (s)                           | 20.5 (15.8-28.2)   | 20.3 (15.3-28.3)   | 20.9 (15.9-27.9)   | 0.975 |
| INR                              | 1.8 (1.4-2.5)      | 1.8 (1.4-2.5)      | 1.9 (1.4-2.5)      | 0.853 |
| PLT (10 <sup>9</sup> /L)         | 75.5 (37.0-116.8)  | 66.5 (33.5-116.8)  | 77.0 (42.0-115.8)  | 0.659 |
| Indication for transplant        |                    |                    |                    | 0.899 |
| Cryptogenic cirrhosis            | 52 (59.1%)         | 27 (61.4%)         | 25 (56.8%)         |       |
| Hepatitis viruses                | 29 (33.0%)         | 13 (29.5%)         | 16 (36.4%)         |       |
| Cholestatic                      | 5 (5.7%)           | 3 (6.8%)           | 2 (4.5%)           |       |
| Other                            | 2 (2.3%)           | 1 (2.3%)           | 1 (2.3%)           |       |
| MELD                             | 24.4 ± 9.8         | 23.2 ± 9.4         | 25.7 ± 10.2        | 0.231 |
| EAD                              | 27 (30.7%)         | 14 (31.8%)         | 13 (29.5%)         | 0.817 |

<sup>a</sup>: there was one case of missing data; <sup>b</sup>: there were three cases of missing data; <sup>c</sup>: there was one case of missing data; <sup>d</sup>: there were four cases of missing data; BMI:

body mass index; ALT: alanine transaminase; AST: aspartate transaminase; PLT: platelet; INR: international normalized ratio; CIT, cold ischemia time; DWIT, donor warm ischemia time; MELD, model for end-stage liver disease; EAD, early allograft dysfunction. Continuous variables were compared using Student's t test or Mann-Whitney U test when the variables were not normally distributed. Categorical variables were compared using Pearson's chi-square test or Fisher's exact test. Two-sided.

**Table S2. Baseline characteristics and clinicopathological features of patients from tissue microarray.**

|                                       | Total (n = 115)    | FGF21_low<br>(n = 46) | FGF21_high<br>(n = 69) | P     |
|---------------------------------------|--------------------|-----------------------|------------------------|-------|
| <b>Donor characteristics</b>          |                    |                       |                        |       |
| Age (y)                               | 40.2 ± 12.7        | 41.4 ± 13.9           | 39.3 ± 11.8            | 0.397 |
| Sex                                   |                    |                       |                        | 0.915 |
| Male                                  | 98 (85.2%)         | 39 (84.8%)            | 59 (85.5%)             |       |
| Female                                | 17 (14.8%)         | 7 (15.2%)             | 10 (14.5%)             |       |
| BMI (kg/m <sup>2</sup> )              | 23.1 (21.3-24.5)   | 22.9 (20.8-26.0)      | 23.2 (21.5-24.2)       | 0.615 |
| Preoperative lab tests                |                    |                       |                        |       |
| ALT (U/L) <sup>a</sup>                | 33.0 (20.3-61.0)   | 35.0 (22.6-78.0)      | 31.5 (18.0-57.0)       | 0.327 |
| AST (U/L) <sup>b</sup>                | 43.0 (31.0-75.0)   | 43.5 (32.0-85.0)      | 43.0 (28.0-72.0)       | 0.549 |
| Bilirubin (μmol/L) <sup>c</sup>       | 17.0 (10.7-27.9)   | 16.9 (10.0-27.0)      | 17.0 (10.7-31.0)       | 0.914 |
| PLT (10 <sup>9</sup> /L) <sup>d</sup> | 132.0 (79.0-210.5) | 154.5 (87.5-240.0)    | 121.0 (75.0-209.0)     | 0.188 |
| <b>Transplant characteristics</b>     |                    |                       |                        |       |
| Donor type                            |                    |                       |                        | 0.284 |
| DBD                                   | 63 (54.8%)         | 28 (60.9%)            | 35 (50.7%)             |       |
| DCD                                   | 52 (45.2%)         | 18 (39.1%)            | 34 (49.3%)             |       |
| CIT (h)                               | 7.2 (5.7-11.0)     | 7.9 (6.4-11.6)        | 6.8 (5.5-10.3)         | 0.073 |
| DWIT (min)                            | 9.0 (0.0-14.0)     | 10.5 (1.0-15.3)       | 8.0 (0.0-12.0)         | 0.060 |
| ABO match                             |                    |                       |                        | 0.734 |
| Compatible                            | 83 (72.2%)         | 34 (73.9%)            | 49 (71.0%)             |       |
| Incompatible                          | 32 (27.8%)         | 12 (26.1%)            | 20 (29.0%)             |       |
| The cause of graft loss               |                    |                       |                        | 0.904 |
| Primary non-function                  | 2 (1.7%)           | 1 (2.2%)              | 1 (1.4%)               |       |
| Biliary complication                  | 3 (2.6%)           | 2 (4.3%)              | 1 (1.4%)               |       |

|                                  |                   |                   |                   |       |
|----------------------------------|-------------------|-------------------|-------------------|-------|
| Other                            | 15 (13.0%)        | 8 (17.4%)         | 7 (10.1%)         |       |
| <b>Recipient characteristics</b> |                   |                   |                   |       |
| Age (y)                          | 51.2 ± 9.8        | 52.4 ± 11.3       | 50.5 ± 8.7        | 0.303 |
| Sex                              |                   |                   |                   | 0.223 |
| Male                             | 91 (79.1%)        | 39 (84.8%)        | 52 (75.4%)        |       |
| Female                           | 24 (20.9%)        | 7 (15.2%)         | 17 (24.6%)        |       |
| BMI (kg/m <sup>2</sup> )         | 22.7 (20.7-24.2)  | 22.8 (19.8-24.5)  | 22.6 (21.4-24.2)  | 0.943 |
| Preoperative lab tests           |                   |                   |                   |       |
| ALT (U/L)                        | 37.0 (21.0-71.0)  | 35.0 (20.5-68.5)  | 48.5 (22.5-110.8) | 0.612 |
| AST (U/L)                        | 63.0 (33.0-124.0) | 62.0 (32.5-109.0) | 69.5 (34.8-138.3) | 0.297 |
| Bilirubin (μmol/L)               | 62.0 (21.0-319.0) | 62.0 (18.5-304.5) | 76.5 (26.0-373.0) | 0.905 |
| PT (s)                           | 14.8 (12.9-23.6)  | 14.8 (12.8-23.5)  | 15.0 (12.9-23.8)  | 0.853 |
| INR                              | 1.3 (1.1-2.1)     | 1.3 (1.1-2.1)     | 1.3 (1.1-2.1)     | 0.828 |
| PLT (10 <sup>9</sup> /L)         | 55.0 (90.0-153.0) | 85.0 (57.0-156.0) | 96.0 (51.8-143.3) | 0.895 |
| Indication for transplant        |                   |                   |                   | 0.670 |
| Cryptogenic cirrhosis            | 77 (67.0%)        | 31 (67.4%)        | 46 (66.7%)        |       |
| Hepatitis viruses                | 23 (20.0%)        | 10 (21.7%)        | 13 (18.8%)        |       |
| Cholestatic                      | 6 (5.2%)          | 3 (6.5%)          | 3 (4.3%)          |       |
| Other                            | 9 (7.8%)          | 2 (4.3%)          | 7 (10.1%)         |       |
| MELD                             | 18.0 (10.0-34.0)  | 20.0 (11.0-40.0)  | 16.0 (9.0-33.5)   | 0.298 |
| EAD                              | 37 (32.2%)        | 16 (36.8%)        | 21 (30.4%)        | 0.625 |

<sup>a</sup>: there were six cases of missing data; <sup>b</sup>: there were eight cases of missing data; <sup>c</sup>: there were six cases of missing data; <sup>d</sup>: there were eleven cases of missing data; BMI: body mass index; ALT: alanine transaminase; AST: aspartate transaminase; PLT: platelet; INR: international normalized ratio; CIT, cold ischemia time; DWIT, donor warm ischemia time; MELD, model for end-stage liver disease; EAD, early allograft dysfunction. Continuous variables were compared using Student's t test or Mann-Whitney U test when the variables were not normally distributed. Categorical variables were compared using Pearson's chi-square test or Fisher's exact test. Two-sided.

**Table S3. Baseline characteristics and clinicopathological features of steatotic LT patients included in the tissue microarray.**

|                                       | Total (n = 78)     | Non-EAD (n = 50)   | EAD (n = 28)        | P     |
|---------------------------------------|--------------------|--------------------|---------------------|-------|
| <b>Donor characteristics</b>          |                    |                    |                     |       |
| Age (y)                               | 41.2 ± 12.4        | 39.9 ± 13.3        | 43.6 ± 10.4         | 0.109 |
| Sex                                   |                    |                    |                     | 0.712 |
| Male                                  | 63 (80.8%)         | 41 (82.0%)         | 22 (78.6%)          |       |
| Female                                | 15 (19.2%)         | 9 (18.0%)          | 6 (21.4%)           |       |
| BMI (kg/m <sup>2</sup> )              | 24.2 (22.0-26.1)   | 24.5 (22.0-26.7)   | 23.4 (22.4-25.6)    | 0.200 |
| Preoperative lab tests                |                    |                    |                     |       |
| ALT (U/L) <sup>a</sup>                | 40.0 (19.0-65.0)   | 39.0 (22.0-62.0)   | 49.7 (15.0-76.0)    | 0.745 |
| AST (U/L) <sup>b</sup>                | 47.5 (30.0-103.0)  | 39.9 (29.0-111.0)  | 70.0 (34.4-88.0)    | 0.359 |
| Bilirubin (μmol/L) <sup>c</sup>       | 14.4 (10.5-20.1)   | 13.8 (10.4-19.5)   | 14.8 (12.8-20.2)    | 0.337 |
| PLT (10 <sup>9</sup> /L) <sup>d</sup> | 129.0 (81.0-199.0) | 120.0 (77.0-204.0) | 131.5 (111.0-190.0) | 0.606 |
| <b>Transplant characteristics</b>     |                    |                    |                     |       |
| Donor type                            |                    |                    |                     | 0.496 |
| DBD                                   | 35 (44.9%)         | 21 (42.0%)         | 14 (50.0%)          |       |
| DCD                                   | 43 (55.1%)         | 29 (58.0%)         | 14 (50.0%)          |       |
| CIT (h)                               | 10.0 (6.9-12.5)    | 9.8 (6.8-12.0)     | 10.5 (7.4-13.2)     | 0.274 |
| DWIT (min)                            | 8.0 (1.0-13.0)     | 8.0 (0.0-13.0)     | 8.5 (1.8-14.5)      | 0.608 |
| ABO match                             |                    |                    |                     | 0.182 |
| Compatible                            | 52 (66.7%)         | 36 (72.0%)         | 16 (57.1%)          |       |
| Incompatible                          | 26 (33.3%)         | 14 (28.0%)         | 12 (42.9%)          |       |
| The cause of graft loss               |                    |                    |                     | 0.322 |
| Primary non-function                  | 4 (5.1%)           | 1 (2.0%)           | 3 (10.7%)           |       |
| Hepatic artery thrombosis             | 1 (1.3%)           | 0 (0)              | 1 (3.6%)            |       |

|                                  |                    |                    |                    |       |
|----------------------------------|--------------------|--------------------|--------------------|-------|
| Biliary complication             | 1 (1.3%)           | 1 (2.0%)           | 0 (0)              |       |
| Other                            | 17 (21.8%)         | 10 (20.0%)         | 7 (25.0%)          |       |
| <b>Recipient characteristics</b> |                    |                    |                    |       |
| Age (y)                          | 46.4 ± 13.1        | 45.3 ± 12.2        | 48.4 ± 14.8        | 0.899 |
| Sex                              |                    |                    |                    | 0.709 |
| Male                             | 67 (85.9%)         | 44 (88.0%)         | 23 (82.1%)         |       |
| Female                           | 11 (14.1%)         | 6 (12.0%)          | 5 (17.9%)          |       |
| BMI (kg/m <sup>2</sup> )         | 22.9 (20.6-25.2)   | 22.8 (20.8-25.8)   | 23.4 (20.1-25.1)   | 0.937 |
| Preoperative lab tests           |                    |                    |                    |       |
| ALT (U/L)                        | 48.0 (28.8-134.5)  | 37.0 (28.0-83.3)   | 82.0 (34.3-191.5)  | 0.092 |
| AST (U/L)                        | 74.0 (36.0-150.3)  | 61.0 (35.5-117.8)  | 93.0 (41.0-191.3)  | 0.162 |
| Bilirubin (μmol/L)               | 203.0 (36.0-380.5) | 158.5 (35.5-310.9) | 293.0 (54.3-504.5) | 0.040 |
| PT (s)                           | 20.2 (14.8-26.6)   | 18.8 (14.9-22.7)   | 24.9 (14.4-38.7)   | 0.045 |
| INR                              | 1.8 (1.3-2.4)      | 1.7 (1.3-2.0)      | 2.2 (1.2-3.3)      | 0.044 |
| PLT (10 <sup>9</sup> /L)         | 76.5 (44.0-106.3)  | 80.5 (45.5-108.8)  | 63.0 (44.0-90.8)   | 0.218 |
| Indication for transplant        |                    |                    |                    |       |
| Cryptogenic cirrhosis            | 43 (55.1%)         | 28 (56.0%)         | 15 (53.6%)         |       |
| Hepatitis viruses                | 21 (26.9%)         | 14 (28.0%)         | 7 (25.0%)          |       |
| Cholestatic                      | 5 (6.4%)           | 4 (8.0%)           | 1 (3.6%)           |       |
| Other                            | 9 (11.5%)          | 4 (8.0%)           | 5 (17.9%)          |       |
| MELD                             | 28.0 (16.3-33.0)   | 26.0 (14.0-33.0)   | 29.0 (24.0-33.8)   | 0.239 |

<sup>a</sup>: there were five cases of missing data; <sup>b</sup>: there were eight cases of missing data; <sup>c</sup>: there were six cases of missing data; <sup>d</sup>: there were five cases of missing data; BMI: body mass index; ALT: alanine transaminase; AST: aspartate transaminase; PLT: platelet; INR: international normalized ratio; CIT, cold ischemia time; DWIT, donor warm ischemia time; MELD, model for end-stage liver disease; EAD, early allograft dysfunction. Continuous variables were compared using Student's t test or Mann-Whitney U test when the variables were not normally distributed. Categorical variables were compared using Pearson's chi-square test or Fisher's exact test. Two-sided.



**Table S4. The summary of 42 surface and intracellular immune markers used in CyTOF.**

| <b>Number</b> | <b>Pathway</b> | <b>Antibody</b> | <b>Number</b> | <b>Pathway</b> | <b>Antibody</b> |
|---------------|----------------|-----------------|---------------|----------------|-----------------|
| 1             | 89Y            | CD45            | 22            | 159Tb          | F4_80           |
| 2             | 115ln          | CD3             | 23            | 160Gd          | CD274_PDL-1     |
| 3             | 139La          | CD44            | 24            | 161Dy          | iNOS            |
| 4             | 141Pr          | CCR2            | 25            | 162Dy          | CD206           |
| 5             | 142Nd          | MHC II          | 26            | 163Dy          | CD25_IL-2Ra     |
| 6             | 143Nd          | CD366_Tim-3     | 27            | 164Dy          | RORgt           |
| 7             | 144Nd          | T-bet           | 28            | 165Ho          | NK1.1           |
| 8             | 145Nd          | GR-1            | 29            | 166Er          | Arg1            |
| 9             | 146Nd          | TER-119         | 30            | 167Er          | CD16_32         |
| 10            | 147Sm          | Ly6G            | 31            | 168Er          | FoxP3           |
| 11            | 148Nd          | Ly6C            | 32            | 169Tm          | CD127           |
| 12            | 149Sm          | CX3CR1          | 33            | 170Er          | CD49a           |
| 13            | 150Nd          | CD49b           | 34            | 171Yb          | GATA3           |
| 14            | 151Eu          | Null            | 35            | 172Yb          | PD-1            |
| 15            | 152Sm          | CD11c           | 36            | 173Yb          | CD115           |
| 16            | 153Eu          | TCRgd           | 37            | 174Yb          | CTLA-4          |
| 17            | 154Sm          | CD62L           | 38            | 175Lu          | TCRb            |
| 18            | 155Gd          | CD80            | 39            | 176Yb          | MerTK           |
| 19            | 156Gd          | CD1d            | 40            | 197Au          | CD4             |
| 20            | 157Gd          | NKp46           | 41            | 198Pt          | CD8a            |
| 21            | 158Gd          | CD19            | 42            | 209Bi          | CD11b           |

**Table S5. A list of antibodies and reagents used.**

| <b>Antibody</b>            | <b>Company</b> | <b>Catalog number</b> |
|----------------------------|----------------|-----------------------|
| Anti- $\beta$ -actin       | Proteintech    | # 66009-1-Ig          |
| Anti-GAPDH                 | Abcam          | # ab8245              |
| Anti-FGF21                 | Abcam          | # ab171941            |
| Anti-Bcl-2                 | CST            | # 3498-T              |
| Anti-Cleaved caspase-3     | CST            | # 9661                |
| Anti-CD11b                 | Invitrogen     | # 14-0112-85          |
| Anti-MPO                   | Proteintech    | # 22225-1-AP          |
| Anti-ALOX15                | Abcam          | # ab244205            |
| Anti-FGFR1(phosphor Y654)  | Abcam          | # ab59194             |
| Anti-FGFR4 (phosphor Y642) | Abcam          | # ab192589            |
| Anti-Phospho-AKT           | CST            | # 4060T               |
| Anti-Phospho-ERK1/2        | CST            | # 9106S               |
| Anti-BAX                   | Proteintech    | # 60267-1-Ig          |
| Goat Anti-rabbit HRP       | Fude           | # FDR007              |
| Goat Anti-mouse HRP        | Fude           | # FDM007              |
| PD-166866                  | MCE            | # HY-101296           |
| FGF-401                    | MCE            | # HY-101568           |
| SCH772984                  | MCE            | # HY-50846            |
| LY294002                   | MCE            | # HY-10108            |
